# Supplementary material for: Development of the Tactile Map Creator (TMC) Application
Source: MDPI journal article supplement (doi:10.3390/disabilities2010002), 2021-12-22
Supplement: s1 [file s1]

Archive with 1 entries (1 files):
- disabilities-1445428-supplementary.pdf
